# Supplementary material
Source: Springer Nature journal article supplement (https://www.springermedizin.de/resource/supplementary/12937_2010_383_MOESM2_ESM.pdf/25653272)

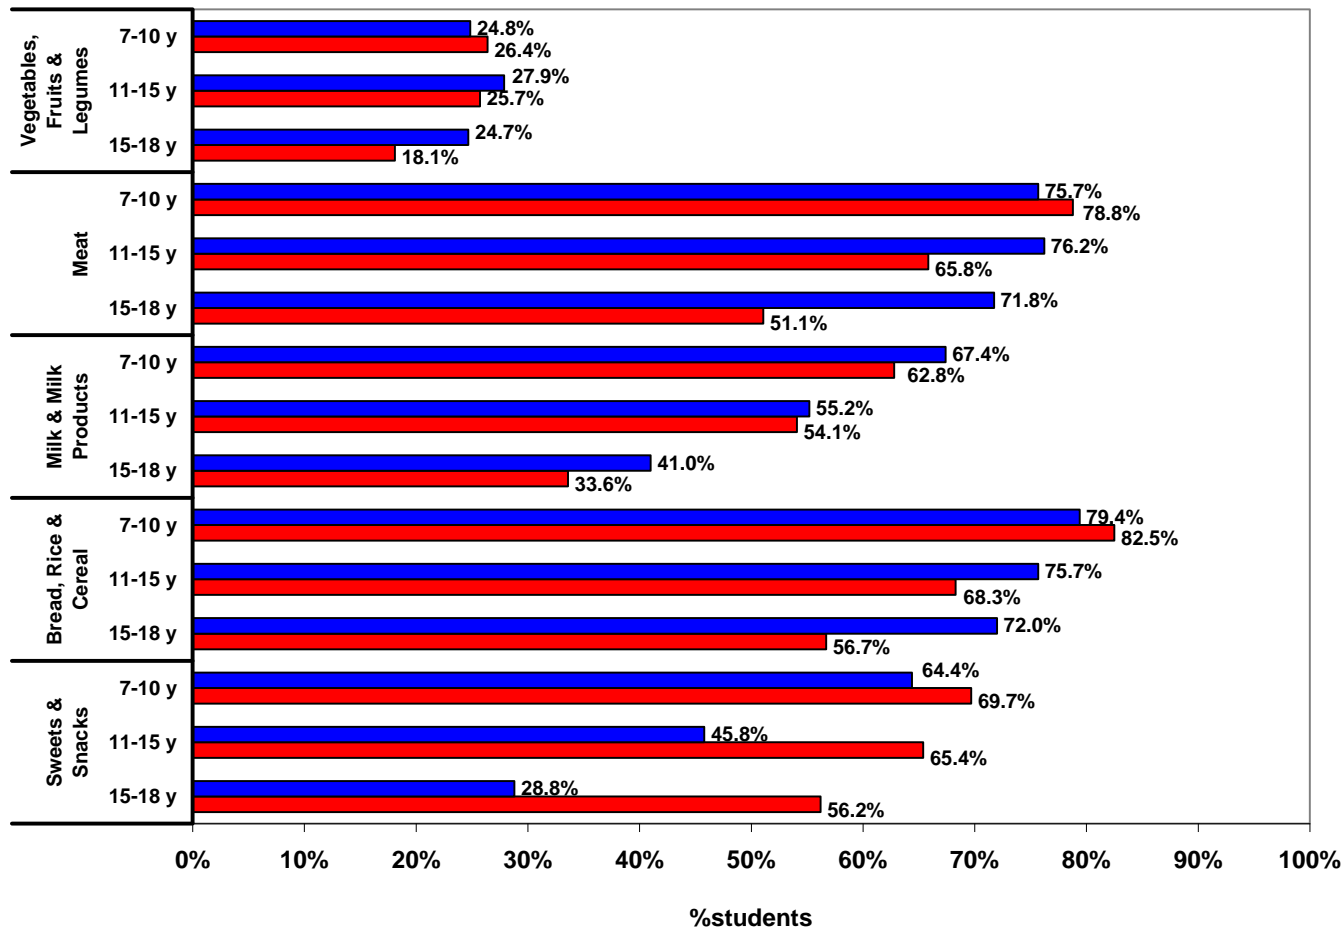

■ GIRLS (n=1241)  
■ BOYS (n=1189)

\* Non responders: 72 for girls and 60 for boys

Supplement: MOESM2 [file 25653272]
